# Supplementary material
Source: PubMed Central journal article supplement (PMC8475155)
Supplement: jitc-2020-001694supp001.pdf [file jitc-2020-001694supp001.pdf]

**Supplementary Tables**

**Supplementary Table 1.** ICI cohort: Tumor therapy history according to SARS-CoV-2 test status

**Supplementary Table 2.** ICI cohort: Hematological variables at serologic test according to SARS-CoV-2 status

**Supplementary Table 3.** SARS-CoV-2 testing

**Supplementary Table 4.** Adverse reactions: trend test - ICI cohort by SARS-CoV-2 test results and overall

**Supplementary Table 5.** Univariable logistic regression models for SAE- SARS-CoV-2 positive patients within ICI cohort

**Supplementary Table 6:** Summary statistics of AEs, SAEs and deaths – Sensitivity analysis according to nasal swab SARS-CoV-2 status

**Supplementary Table 7:** Evaluation of AEs, SAEs and deaths by SARS-CoV-2 positivity – Sensitivity analysis according to nasal swab SARS-CoV-2 status

**Supplementary Table 1** ICI cohort: Tumor therapy history according to SARS-CoV-2 test status

|                                                                                                     | SARS-CoV-2 Negative<br>N=107 | SARS-CoV-2 Positive<br>N=52 | OVERALL<br>N=159 |
|-----------------------------------------------------------------------------------------------------|------------------------------|-----------------------------|------------------|
| <b>Number of patients using Corticosteroids or other types of immunosuppressant</b>                 | 40 (37.4)                    | 16 (30.8)                   | 56 (35.2)        |
| <b>Tumor treatment characteristics</b>                                                              |                              |                             |                  |
| First line adjuvant therapy                                                                         | 21 (19.6)                    | 13 (25.0)                   | 34 (21.4)        |
| First line therapy for advanced treatment                                                           | 53 (49.5)                    | 24 (46.2)                   | 77 (48.4)        |
| Subsequent line for advanced treatment                                                              | 33 (30.8)                    | 15 (28.8)                   | 48 (30.2)        |
| <b>Type of immunotherapy*</b>                                                                       |                              |                             |                  |
| Anti CTLA4                                                                                          | 2 (1.9)                      | 0 (0.0)                     | 2 (1.3)          |
| Anti PD1/PDL-1                                                                                      | 91 (85.0)                    | 46 (88.5)                   | 137 (86.2)       |
| Combined therapies                                                                                  | 14 (13.1)                    | 6 (11.5)                    | 20 (12.6)        |
| <b>Duration of last anti-cancer therapy (months from start to last dose prior to serology test)</b> |                              |                             |                  |
| Mean (SD)                                                                                           | 8.6 (9.5)                    | 9.0 (13.9)                  | 8.7 (11.1)       |
| Median (Q1 - Q3)                                                                                    | 5.1 (1.5-13.0)               | 3.0 (0.9-11.5)              | 4.8 (1.4-12.0)   |
| Min - Max                                                                                           | 0.0 - 53.3                   | 0.0 - 78.8                  | 0.0 - 78.8       |
| Missing                                                                                             | 3                            | 1                           | 4                |
| <b>Tumor response (at serology test)**</b>                                                          |                              |                             |                  |
| CR                                                                                                  | 8 (12.3)                     | 6 (21.4)                    | 14 (15.1)        |
| PD                                                                                                  | 11 (16.9)                    | 6 (21.4)                    | 17 (18.3)        |
| PR                                                                                                  | 14 (21.5)                    | 6 (21.4)                    | 20 (21.5)        |
| SD                                                                                                  | 32 (49.2)                    | 10 (35.7)                   | 42 (45.2)        |
| Missing                                                                                             | 42                           | 24                          | 66               |
| <b>ORR (at serology test)**</b>                                                                     |                              |                             |                  |
| CR+PR                                                                                               | 22 (33.8)                    | 12 (42.9)                   | 34 (36.6)        |
| SD+PD                                                                                               | 43 (66.2)                    | 16 (57.1)                   | 59 (63.4)        |
| Missing                                                                                             | 42                           | 24                          | 66               |

**Legend:** Positive: one positive result from serologic test or nasal swab.

(\*) Combined therapy refers to the following combinations of therapies: Anti PD-1 and Anti CTLA4, Anti PD-1 and Relatlimab, Anti PD-1 and chemotherapy, Anti PD-1 and Levantinib, Anti PD-1 and Ribociclib, Anti VEGFR and chemotherapy. (\*\*) Out of 66 missing responses, 30 are from patients treated with adjuvant chemotherapy.

**Supplementary Table 2.** ICI cohort: Hematological variables at serologic test according to SARS-CoV-2 status

|                                                                                                                                                                     | SARS-CoV-2 negative<br>N=107 | SARS-CoV-2 positive<br>N=52 | OVERALL<br>N=159    |
|---------------------------------------------------------------------------------------------------------------------------------------------------------------------|------------------------------|-----------------------------|---------------------|
| <b>Neutrophil count (10L)</b>                                                                                                                                       |                              |                             |                     |
| Mean (SD)                                                                                                                                                           | 4.8 (2.2)                    | 4.7 (1.9)                   | 4.8 (2.1)           |
| Median (Q1 - Q3)                                                                                                                                                    | 4.5 (3.2-6.0)                | 4.6 (3.4-6.1)               | 4.5 (3.2-6.0)       |
| Min - Max                                                                                                                                                           | 0.0 - 11.1                   | 1.7 - 9.9                   | 0.0 - 11.1          |
| Missing                                                                                                                                                             | 18                           | 7                           | 25                  |
| <b>Values out of normal range (2-6.7)</b>                                                                                                                           | 16 (18.0)                    | 9 (20.0)                    | 25 (18.7)           |
| Missing                                                                                                                                                             | 18                           | 7                           | 25                  |
| <b>Lymphocyte count (10L)</b>                                                                                                                                       |                              |                             |                     |
| Mean (SD)                                                                                                                                                           | 2.0 (0.9)                    | 1.7 (0.7)                   | 1.9 (0.9)           |
| Median (Q1 - Q3)                                                                                                                                                    | 1.9 (1.5-2.6)                | 1.6 (1.2-2.2)               | 1.8 (1.3-2.4)       |
| Min - Max                                                                                                                                                           | 0.5 - 5.2                    | 0.4 - 4.2                   | 0.4 - 5.2           |
| Missing                                                                                                                                                             | 21                           | 8                           | 29                  |
| <b>Values out of normal range (1.13-3.4)</b>                                                                                                                        | 19 (22.1)                    | 10 (22.7)                   | 29 (22.3)           |
| Missing                                                                                                                                                             | 21                           | 8                           | 29                  |
| <b>Neutrophil/Lymphocyte ratio</b>                                                                                                                                  |                              |                             |                     |
| Mean (SD)                                                                                                                                                           | 2.7 (2.0)                    | 3.4 (2.8)                   | 3.0 (2.3)           |
| Median (Q1 - Q3)                                                                                                                                                    | 2.1 (1.4-3.4)                | 2.7 (1.7-4.2)               | 2.2 (1.6-3.7)       |
| Min - Max                                                                                                                                                           | 0.0 - 13.2                   | 0.7 - 17.5                  | 0.0 - 17.5          |
| Missing                                                                                                                                                             | 21                           | 8                           | 29                  |
| <b>Platelet count (10L)</b>                                                                                                                                         |                              |                             |                     |
| Mean (SD)                                                                                                                                                           | 237.1 (74.9)                 | 254.0 (96.4)                | 242.7 (82.6)        |
| Median (Q1 - Q3)                                                                                                                                                    | 225.0 (192.0-266.0)          | 224.5 (195.5-275.5)         | 225.0 (194.0-270.0) |
| Min - Max                                                                                                                                                           | 78.0 - 471.0                 | 136.0 - 626.0               | 78.0 - 626.0        |
| Missing                                                                                                                                                             | 18                           | 8                           | 26                  |
| <b>Values out of normal range (150-400)</b>                                                                                                                         | 9 (10.1)                     | 7 (15.9)                    | 16 (12.0)           |
| Missing                                                                                                                                                             | 18                           | 8                           | 26                  |
| <b>Legend:</b> Positive: one positive result from serologic test or nasal swab. <b>Note:</b> Hematological variables were measured at the time of serologic testing |                              |                             |                     |

**Supplementary Table 3 SARS-CoV-2 testing**

|                                                                                                                                     | <b>CT<br/>N=50</b> | <b>TTs<br/>N=84</b> | <b>ICIs<br/>N=159</b> | <b>OVERALL<br/>N=293</b> |
|-------------------------------------------------------------------------------------------------------------------------------------|--------------------|---------------------|-----------------------|--------------------------|
| <b>Testing strategy</b>                                                                                                             |                    |                     |                       |                          |
| Both                                                                                                                                | 17 (34.0)          | 29 (34.5)           | 58 (36.5)             | 104 (35.5)               |
| Only serology test*                                                                                                                 | 33 (66.0)          | 53 (63.1)           | 92 (57.9)             | 178 (60.8)               |
| Only nasal swab                                                                                                                     | 0 (0.0)            | 2 (2.4)             | 9 (5.7)               | 11 (3.8)                 |
| <b>For patients with only nasal swab – results – n(%)</b>                                                                           |                    |                     |                       |                          |
| Negative                                                                                                                            | -                  | 2 (100.0)           | 1 (11.1)              | 3 (27.3)                 |
| Positive                                                                                                                            | -                  | 0 (0.0)             | 8 (88.9)              | 8 (72.7)                 |
| <b>Number of patients positive by serology testing – n(%)</b>                                                                       |                    |                     |                       |                          |
|                                                                                                                                     | 13 (26.0)          | 24 (29.3)           | 44 (29.3)             | 81 (28.7)                |
| <b>Nasal swab test results in patients with previous positive serological test</b>                                                  |                    |                     |                       |                          |
| Negative                                                                                                                            | 10 (76.9)          | 16 (66.7)           | 4 (9.1)               | 30 (37.0)                |
| Positive                                                                                                                            | 3 (23.1)           | 8 (33.3)            | 40 (90.9)             | 51 (63.0)                |
| <b>Overall SARS-COV 2 status</b>                                                                                                    |                    |                     |                       |                          |
| Negative                                                                                                                            | 37 (74.0)          | 60 (71.4)           | 107 (67.3)            | 204 (69.6)               |
| Positive                                                                                                                            | 13 (26.0)          | 24 (28.6)           | 52 (32.7)             | 89 (30.4)                |
| <b>Comparison of patients test results:</b>                                                                                         |                    |                     |                       |                          |
| <b>Chi squared test pvalue</b>                                                                                                      | 0.610              |                     |                       |                          |
| <b>Legend:</b> N: number of subjects; CT: chemotherapy, TTs: targeted therapy, ICIs: immune checkpoint inhibitors                   |                    |                     |                       |                          |
| (*) patients with only serology test are all negative for SARS-CoV-2 since in case of positive result nasal swab was also performed |                    |                     |                       |                          |

**Supplementary Table 4:** Adverse reactions: trend test - ICI cohort by SARS-CoV-2 test results and overall

| <b>Toxicity - N=159</b>           | <b>G0<br/>n (%)</b> | <b>G1<br/>n (%)</b> | <b>G2<br/>n (%)</b> | <b>G3<br/>n (%)</b> | <b>G4<br/>n (%)</b> | <b>G5<br/>n (%)</b> | <b>G3+G4+G5<br/>n (%)</b> | <b>Chi square for trend<br/>(exact pvalue)</b> |
|-----------------------------------|---------------------|---------------------|---------------------|---------------------|---------------------|---------------------|---------------------------|------------------------------------------------|
| <b>OVERALL</b>                    |                     |                     |                     |                     |                     |                     |                           | 0.849                                          |
| SARS-CoV-2 Negative               | 70 (65.4)           | 20 (18.7)           | 15 (14.0)           | 2 (1.9)             | 0 (0.0)             | 0 (0.0)             | 2 (1.9)                   |                                                |
| SARS-CoV-2 Positive               | 39 (75.0)           | 1 (1.9)             | 9 (17.3)            | 2 (3.8)             | 1 (1.9)             | 0 (0.0)             | 3 (5.8)                   |                                                |
| <b>Cardiac AE</b>                 |                     |                     |                     |                     |                     |                     |                           | 0.034                                          |
| SARS-CoV-2 Negative               | 107 (100)           | 0 (0.0)             | 0 (0.0)             | 0 (0.0)             | 0 (0.0)             | 0 (0.0)             | 0 (0.0)                   |                                                |
| SARS-CoV-2 Positive               | 49 (94.2)           | 1 (1.9)             | 2 (3.8)             | 0 (0.0)             | 0 (0.0)             | 0 (0.0)             | 0 (0.0)                   |                                                |
| <b>-Elevation of the troponin</b> |                     |                     |                     |                     |                     |                     |                           | 0.327                                          |
| SARS-CoV-2 Negative               | 107 (100)           | 0 (0.0)             | 0 (0.0)             | 0 (0.0)             | 0 (0.0)             | 0 (0.0)             | 0 (0.0)                   |                                                |
| SARS-CoV-2 Positive               | 51 (98.1)           | 1 (1.9)             | 0 (0.0)             | 0 (0.0)             | 0 (0.0)             | 0 (0.0)             | 0 (0.0)                   |                                                |
| <b>-Hypertension</b>              |                     |                     |                     |                     |                     |                     |                           | 0.106                                          |
| SARS-CoV-2 Negative               | 107 (100)           | 0 (0.0)             | 0 (0.0)             | 0 (0.0)             | 0 (0.0)             | 0 (0.0)             | 0 (0.0)                   |                                                |
| SARS-CoV-2 Positive               | 50 (96.2)           | 0 (0.0)             | 2 (3.8)             | 0 (0.0)             | 0 (0.0)             | 0 (0.0)             | 0 (0.0)                   |                                                |
| <b>Endocrinological AE</b>        |                     |                     |                     |                     |                     |                     |                           | 0.071                                          |
| SARS-CoV-2 Negative               | 90 (84.1)           | 14 (13.1)           | 3 (2.8)             | 0 (0.0)             | 0 (0.0)             | 0 (0.0)             | 0 (0.0)                   |                                                |
| SARS-CoV-2 Positive               | 50 (96.2)           | 1 (1.9)             | 1 (1.9)             | 0 (0.0)             | 0 (0.0)             | 0 (0.0)             | 0 (0.0)                   |                                                |
| <b>-Hyperthyroidism</b>           |                     |                     |                     |                     |                     |                     |                           | 1.000                                          |
| SARS-CoV-2 Negative               | 103 (96.3)          | 3 (2.8)             | 1 (0.9)             | 0 (0.0)             | 0 (0.0)             | 0 (0.0)             | 0 (0.0)                   |                                                |
| SARS-CoV-2 Positive               | 50 (96.2)           | 1 (1.9)             | 1 (1.9)             | 0 (0.0)             | 0 (0.0)             | 0 (0.0)             | 0 (0.0)                   |                                                |
| <b>-Hypothyroidism</b>            |                     |                     |                     |                     |                     |                     |                           | 0.050                                          |
| SARS-CoV-2 Negative               | 98 (91.6)           | 8 (7.5)             | 1 (0.9)             | 0 (0.0)             | 0 (0.0)             | 0 (0.0)             | 0 (0.0)                   |                                                |
| SARS-CoV-2 Positive               | 52 (100)            | 0 (0.0)             | 0 (0.0)             | 0 (0.0)             | 0 (0.0)             | 0 (0.0)             | 0 (0.0)                   |                                                |
| <b>-Pituitary</b>                 |                     |                     |                     |                     |                     |                     |                           | 1.000                                          |
| SARS-CoV-2 Negative               | 106 (99.1)          | 0 (0.0)             | 1 (0.9)             | 0 (0.0)             | 0 (0.0)             | 0 (0.0)             | 0 (0.0)                   |                                                |
| SARS-CoV-2 Positive               | 52 (100)            | 0 (0.0)             | 0 (0.0)             | 0 (0.0)             | 0 (0.0)             | 0 (0.0)             | 0 (0.0)                   |                                                |
| <b>-Vitiligo</b>                  |                     |                     |                     |                     |                     |                     |                           | 0.551                                          |
| SARS-CoV-2 Negative               | 104 (97.2)          | 3 (2.8)             | 0 (0.0)             | 0 (0.0)             | 0 (0.0)             | 0 (0.0)             | 0 (0.0)                   |                                                |
| SARS-CoV-2 Positive               | 52 (100)            | 0 (0.0)             | 0 (0.0)             | 0 (0.0)             | 0 (0.0)             | 0 (0.0)             | 0 (0.0)                   |                                                |
| <b>Gastrointestinal AE</b>        |                     |                     |                     |                     |                     |                     |                           | 0.630                                          |

| <b>Toxicity - N=159</b>           | <b>G0<br/>n (%)</b> | <b>G1<br/>n (%)</b> | <b>G2<br/>n (%)</b> | <b>G3<br/>n (%)</b> | <b>G4<br/>n (%)</b> | <b>G5<br/>n (%)</b> | <b>G3+G4+G5<br/>n (%)</b> | <b>Chi square for trend<br/>(exact pvalue)</b> |
|-----------------------------------|---------------------|---------------------|---------------------|---------------------|---------------------|---------------------|---------------------------|------------------------------------------------|
| SARS-CoV-2 Negative               | 91 (85.0)           | 6 (5.6)             | 8 (7.5)             | 2 (1.9)             | 0 (0.0)             | 0 (0.0)             | 2 (1.9)                   |                                                |
| SARS-CoV-2 Positive               | 48 (92.3)           | 0 (0.0)             | 3 (5.8)             | 0 (0.0)             | 1 (1.9)             | 0 (0.0)             | 1 (1.9)                   |                                                |
| <b>-Colitis</b>                   |                     |                     |                     |                     |                     |                     |                           | 1.000                                          |
| SARS-CoV-2 Negative               | 106 (99.1)          | 0 (0.0)             | 0 (0.0)             | 1 (0.9)             | 0 (0.0)             | 0 (0.0)             | 1 (0.9)                   |                                                |
| SARS-CoV-2 Positive               | 52 (100)            | 0 (0.0)             | 0 (0.0)             | 0 (0.0)             | 0 (0.0)             | 0 (0.0)             | 0 (0.0)                   |                                                |
| <b>-Diarrhea</b>                  |                     |                     |                     |                     |                     |                     |                           | 0.101                                          |
| SARS-CoV-2 Negative               | 95 (88.8)           | 5 (4.7)             | 7 (6.5)             | 0 (0.0)             | 0 (0.0)             | 0 (0.0)             | 0 (0.0)                   |                                                |
| SARS-CoV-2 Positive               | 51 (98.1)           | 0 (0.0)             | 1 (1.9)             | 0 (0.0)             | 0 (0.0)             | 0 (0.0)             | 0 (0.0)                   |                                                |
| <b>-Hepatitis</b>                 |                     |                     |                     |                     |                     |                     |                           | 0.779                                          |
| SARS-CoV-2 Negative               | 105 (98.1)          | 1 (0.9)             | 1 (0.9)             | 0 (0.0)             | 0 (0.0)             | 0 (0.0)             | 0 (0.0)                   |                                                |
| SARS-CoV-2 Positive               | 52 (100)            | 0 (0.0)             | 0 (0.0)             | 0 (0.0)             | 0 (0.0)             | 0 (0.0)             | 0 (0.0)                   |                                                |
| <b>-Immuno-mediated hepatitis</b> |                     |                     |                     |                     |                     |                     |                           | 0.327                                          |
| SARS-CoV-2 Negative               | 107 (100)           | 0 (0.0)             | 0 (0.0)             | 0 (0.0)             | 0 (0.0)             | 0 (0.0)             | 0 (0.0)                   |                                                |
| SARS-CoV-2 Positive               | 51 (98.1)           | 0 (0.0)             | 1 (1.9)             | 0 (0.0)             | 0 (0.0)             | 0 (0.0)             | 0 (0.0)                   |                                                |
| <b>-Lipase increased</b>          |                     |                     |                     |                     |                     |                     |                           | 1.000                                          |
| SARS-CoV-2 Negative               | 106 (99.1)          | 0 (0.0)             | 0 (0.0)             | 1 (0.9)             | 0 (0.0)             | 0 (0.0)             | 1 (0.9)                   |                                                |
| SARS-CoV-2 Positive               | 52 (100)            | 0 (0.0)             | 0 (0.0)             | 0 (0.0)             | 0 (0.0)             | 0 (0.0)             | 0 (0.0)                   |                                                |
| <b>-Mucositis</b>                 |                     |                     |                     |                     |                     |                     |                           | 1.000                                          |
| SARS-CoV-2 Negative               | 106 (99.1)          | 0 (0.0)             | 1 (0.9)             | 0 (0.0)             | 0 (0.0)             | 0 (0.0)             | 0 (0.0)                   |                                                |
| SARS-CoV-2 Positive               | 52 (100)            | 0 (0.0)             | 0 (0.0)             | 0 (0.0)             | 0 (0.0)             | 0 (0.0)             | 0 (0.0)                   |                                                |
| <b>-Serum creatine increased</b>  |                     |                     |                     |                     |                     |                     |                           | 0.327                                          |
| SARS-CoV-2 Negative               | 107 (100)           | 0 (0.0)             | 0 (0.0)             | 0 (0.0)             | 0 (0.0)             | 0 (0.0)             | 0 (0.0)                   |                                                |
| SARS-CoV-2 Positive               | 51 (98.1)           | 0 (0.0)             | 1 (1.9)             | 0 (0.0)             | 0 (0.0)             | 0 (0.0)             | 0 (0.0)                   |                                                |
| <b>-Transaminitis</b>             |                     |                     |                     |                     |                     |                     |                           | 0.178                                          |
| SARS-CoV-2 Negative               | 106 (99.1)          | 0 (0.0)             | 1 (0.9)             | 0 (0.0)             | 0 (0.0)             | 0 (0.0)             | 0 (0.0)                   |                                                |
| SARS-CoV-2 Positive               | 50 (96.2)           | 0 (0.0)             | 1 (1.9)             | 0 (0.0)             | 1 (1.9)             | 0 (0.0)             | 1 (1.9)                   |                                                |
| <b>Lung related AE</b>            |                     |                     |                     |                     |                     |                     |                           | 1.000                                          |
| SARS-CoV-2 Negative               | 103 (96.3)          | 0 (0.0)             | 4 (3.7)             | 0 (0.0)             | 0 (0.0)             | 0 (0.0)             | 0 (0.0)                   |                                                |

| <b>Toxicity - N=159</b>                                                                                                    | <b>G0<br/>n (%)</b> | <b>G1<br/>n (%)</b> | <b>G2<br/>n (%)</b> | <b>G3<br/>n (%)</b> | <b>G4<br/>n (%)</b> | <b>G5<br/>n (%)</b> | <b>G3+G4+G5<br/>n (%)</b> | <b>Chi square for trend<br/>(exact pvalue)</b> |
|----------------------------------------------------------------------------------------------------------------------------|---------------------|---------------------|---------------------|---------------------|---------------------|---------------------|---------------------------|------------------------------------------------|
| SARS-CoV-2 Positive                                                                                                        | 50 (96.2)           | 0 (0.0)             | 2 (3.8)             | 0 (0.0)             | 0 (0.0)             | 0 (0.0)             | 0 (0.0)                   |                                                |
| <b>-Pneumonia</b>                                                                                                          |                     |                     |                     |                     |                     |                     |                           | 1.000                                          |
| SARS-CoV-2 Negative                                                                                                        | 103 (96.3)          | 0 (0.0)             | 4 (3.7)             | 0 (0.0)             | 0 (0.0)             | 0 (0.0)             | 0 (0.0)                   |                                                |
| SARS-CoV-2 Positive                                                                                                        | 50 (96.2)           | 0 (0.0)             | 2 (3.8)             | 0 (0.0)             | 0 (0.0)             | 0 (0.0)             | 0 (0.0)                   |                                                |
| <b>Other</b>                                                                                                               |                     |                     |                     |                     |                     |                     |                           | -                                              |
| <b>-Asthenia</b>                                                                                                           |                     |                     |                     |                     |                     |                     |                           | 0.080                                          |
| SARS-CoV-2 Negative                                                                                                        | 106 (99.1)          | 0 (0.0)             | 1 (0.9)             | 0 (0.0)             | 0 (0.0)             | 0 (0.0)             | 0 (0.0)                   |                                                |
| SARS-CoV-2 Positive                                                                                                        | 49 (94.2)           | 0 (0.0)             | 2 (3.8)             | 1 (1.9)             | 0 (0.0)             | 0 (0.0)             | 1 (1.9)                   |                                                |
| <b>-Plantar dysaesthesias</b>                                                                                              |                     |                     |                     |                     |                     |                     |                           | 0.327                                          |
| SARS-CoV-2 Negative                                                                                                        | 107 (100)           | 0 (0.0)             | 0 (0.0)             | 0 (0.0)             | 0 (0.0)             | 0 (0.0)             | 0 (0.0)                   |                                                |
| SARS-CoV-2 Positive                                                                                                        | 51 (98.1)           | 0 (0.0)             | 1 (1.9)             | 0 (0.0)             | 0 (0.0)             | 0 (0.0)             | 0 (0.0)                   |                                                |
| <b>-Staphylococcus Infection</b>                                                                                           |                     |                     |                     |                     |                     |                     |                           | 0.327                                          |
| SARS-CoV-2 Negative                                                                                                        | 107 (100)           | 0 (0.0)             | 0 (0.0)             | 0 (0.0)             | 0 (0.0)             | 0 (0.0)             | 0 (0.0)                   |                                                |
| SARS-CoV-2 Positive                                                                                                        | 51 (98.1)           | 0 (0.0)             | 0 (0.0)             | 1 (1.9)             | 0 (0.0)             | 0 (0.0)             | 1 (1.9)                   |                                                |
| <b>Skin related AE</b>                                                                                                     |                     |                     |                     |                     |                     |                     |                           | 0.407                                          |
| SARS-CoV-2 Negative                                                                                                        | 94 (87.9)           | 11 (10.3)           | 2 (1.9)             | 0 (0.0)             | 0 (0.0)             | 0 (0.0)             | 0 (0.0)                   |                                                |
| SARS-CoV-2 Positive                                                                                                        | 50 (96.2)           | 0 (0.0)             | 2 (3.8)             | 0 (0.0)             | 0 (0.0)             | 0 (0.0)             | 0 (0.0)                   |                                                |
| <b>-Lichen dermatosis</b>                                                                                                  |                     |                     |                     |                     |                     |                     |                           | 1.000                                          |
| SARS-CoV-2 Negative                                                                                                        | 106 (99.1)          | 0 (0.0)             | 1 (0.9)             | 0 (0.0)             | 0 (0.0)             | 0 (0.0)             | 0 (0.0)                   |                                                |
| SARS-CoV-2 Positive                                                                                                        | 52 (100)            | 0 (0.0)             | 0 (0.0)             | 0 (0.0)             | 0 (0.0)             | 0 (0.0)             | 0 (0.0)                   |                                                |
| <b>-Pruritus</b>                                                                                                           |                     |                     |                     |                     |                     |                     |                           | 0.425                                          |
| SARS-CoV-2 Negative                                                                                                        | 98 (91.6)           | 8 (7.5)             | 1 (0.9)             | 0 (0.0)             | 0 (0.0)             | 0 (0.0)             | 0 (0.0)                   |                                                |
| SARS-CoV-2 Positive                                                                                                        | 51 (98.1)           | 0 (0.0)             | 1 (1.9)             | 0 (0.0)             | 0 (0.0)             | 0 (0.0)             | 0 (0.0)                   |                                                |
| <b>-Rash</b>                                                                                                               |                     |                     |                     |                     |                     |                     |                           | 0.464                                          |
| SARS-CoV-2 Negative                                                                                                        | 97 (90.7)           | 9 (8.4)             | 1 (0.9)             | 0 (0.0)             | 0 (0.0)             | 0 (0.0)             | 0 (0.0)                   |                                                |
| SARS-CoV-2 Positive                                                                                                        | 50 (96.2)           | 1 (1.9)             | 1 (1.9)             | 0 (0.0)             | 0 (0.0)             | 0 (0.0)             | 0 (0.0)                   |                                                |
| <b>Legend:</b> SARS-CoV-2 positive: one positive result from serologic test or nasal swab, N: number of subjects; G: Grade |                     |                     |                     |                     |                     |                     |                           |                                                |

**Supplementary Table 5** Univariable logistic regression models for SAE- SARS-CoV-2 positive patients within ICI cohort

|                                     | <b>N</b> | <b>P-value of variable</b> | <b>OR (95% CI)</b> | <b>P-value of contrasts</b> |
|-------------------------------------|----------|----------------------------|--------------------|-----------------------------|
| <b>Age</b>                          | 52       | 0.511                      | 1.02 (0.96 - 1.10) | -                           |
| <b>Sex</b>                          | 52       | 0.334                      |                    |                             |
| Male                                |          |                            | reference          |                             |
| Female                              |          |                            | 2.07 (0.47 - 9.03) | 0.334                       |
| <b>Comorbidity</b>                  | 52       | 0.910                      |                    |                             |
| No                                  |          |                            | reference          |                             |
| Yes                                 |          |                            | 1.09 (0.26 - 4.61) | 0.910                       |
| <b>Platelet count</b>               | 44       | 0.992                      | 1.00 (0.99 - 1.01) | -                           |
| <b>Lymphocyte count</b>             | 44       | 0.056                      | 0.09 (0.01 - 1.06) | -                           |
| <b>Neutrophils/Lymphocyte ratio</b> | 44       | 0.021*                     | 2.76 (1.16 - 6.54) | -                           |

**Legend:** OR: Odds ratio; CI: Confidence Interval

**Supplementary Table 6: Summary statistics of AEs, SAEs and deaths – Sensitivity analysis according to nasal swab SARS-CoV-2 status**

|                                                                                                                                                                          | <b>CT<br/>N=50</b> | <b>TT<br/>N=84</b> | <b>ICI<br/>N=159</b> | <b>OVERALL<br/>N=293</b> |
|--------------------------------------------------------------------------------------------------------------------------------------------------------------------------|--------------------|--------------------|----------------------|--------------------------|
| <b>Number of patients with positive nasal swab test result – n(%)</b>                                                                                                    | 3 (6.0)            | 8 (9.5)            | 48 (30.2)            | 59 (20.1)                |
| <b>Evaluation of AEs</b>                                                                                                                                                 |                    |                    |                      |                          |
| <b>SARS-CoV-2 positive patients</b>                                                                                                                                      | 3 (6.0)            | 8 (9.5)            | 48 (30.2)            | 59 (20.1)                |
| No occurrence of AEs                                                                                                                                                     | 3 (100.0)          | 7 (87.5)           | 36 (75.0)            | 46 (78.0)                |
| Occurrence of AEs                                                                                                                                                        | 0 (0.0)            | 1 (12.5)           | 12 (25.0)            | 13 (22.0)                |
| <b>SARS-CoV-2 negative patients</b>                                                                                                                                      | 47 (94.0)          | 76 (90.5)          | 111 (69.8)           | 234 (79.9)               |
| No occurrence of AEs                                                                                                                                                     | 26 (55.3)          | 53 (69.7)          | 73 (65.8)            | 152 (65.0)               |
| Occurrence of AEs                                                                                                                                                        | 21 (44.7)          | 23 (30.3)          | 38 (34.2)            | 82 (35.0)                |
| <b>Evaluation of SAEs</b>                                                                                                                                                |                    |                    |                      |                          |
| <b>SARS-CoV-2 positive patients</b>                                                                                                                                      | 3 (6.0)            | 8 (9.5)            | 48 (30.2)            | 59 (20.1)                |
| No occurrence of SAE                                                                                                                                                     | 3 (100.0)          | 8 (100.0)          | 39 (81.3)            | 50 (84.7)                |
| Occurrence of SAE                                                                                                                                                        | 0 (0.0)            | 0 (0.0)            | 9 (18.8)             | 9 (15.3)                 |
| <b>SARS-CoV-2 negative patients</b>                                                                                                                                      | 47 (94.0)          | 76 (90.5)          | 111 (69.8)           | 234 (79.9)               |
| No occurrence of SAE                                                                                                                                                     | 44 (93.6)          | 76 (100.0)         | 107 (96.4)           | 227 (97.0)               |
| Occurrence of SAE                                                                                                                                                        | 3 (6.4)            | 0 (0.0)            | 4 (3.6)              | 7 (3.0)                  |
| <b>Evaluation of mortality</b>                                                                                                                                           |                    |                    |                      |                          |
| <b>SARS-CoV-2 positive patients</b>                                                                                                                                      | 3 (6.0)            | 8 (9.5)            | 48 (30.2)            | 59 (20.1)                |
| Alive                                                                                                                                                                    | 3 (100.0)          | 8 (100.0)          | 42 (87.5)            | 53 (89.8)                |
| Dead                                                                                                                                                                     | 0 (0.0)            | 0 (0.0)            | 6 (12.5)             | 6 (10.2)                 |
| <b>SARS-CoV-2 negative patients</b>                                                                                                                                      | 47 (94.0)          | 76 (90.5)          | 111 (69.8)           | 234 (79.9)               |
| Alive                                                                                                                                                                    | 44 (93.6)          | 76 (100.0)         | 109 (98.2)           | 229 (97.9)               |
| Dead                                                                                                                                                                     | 3 (6.4)            | 0 (0.0)            | 2 (1.8)              | 5 (2.1)                  |
| <b>Legend:</b> N: number of subjects; SARS-CoV-2 positive: positive result from nasal swab, CT: chemotherapy, TTs: targeted therapy, ICIs: immune checkpoint inhibitors. |                    |                    |                      |                          |

**Supplementary Table 7: Evaluation of AEs, SAEs and deaths by SARS-CoV-2 positivity – Sensitivity analysis according to nasal swab SARS-CoV-2 status**

|                                                                                                                                               | SARS-CoV-2 negative<br>N=234 | SARS-CoV-2 positive<br>N=59 | Overall<br>N=293 |
|-----------------------------------------------------------------------------------------------------------------------------------------------|------------------------------|-----------------------------|------------------|
| <b>Evaluation of AEs</b>                                                                                                                      |                              |                             |                  |
| No occurrence of AEs                                                                                                                          | 152 (65.0)                   | 46 (78.0)                   | 198 (67.6)       |
| Occurrence of AEs                                                                                                                             | 82 (35.0)                    | 13 (22.0)                   | 95 (32.4)        |
| <b>Fisher exact test pvalue</b>                                                                                                               |                              | 0.063                       |                  |
| <b>Evaluation of SAEs</b>                                                                                                                     |                              |                             |                  |
| No occurrence of SAEs                                                                                                                         | 227 (97.0)                   | 50 (84.7)                   | 277 (94.5)       |
| Occurrence of SAEs                                                                                                                            | 7 (3.0)                      | 9 (15.3)                    | 16 (5.5)         |
| <b>Fisher exact test pvalue</b>                                                                                                               |                              | 0.001*                      |                  |
| <b>Evaluation of mortality</b>                                                                                                                |                              |                             |                  |
| Alive                                                                                                                                         | 229 (97.9)                   | 53 (89.8)                   | 282 (96.2)       |
| Dead                                                                                                                                          | 5 (2.1)                      | 6 (10.2)                    | 11 (3.8)         |
| <b>Fisher exact test pvalue</b>                                                                                                               |                              | 0.011*                      |                  |
| <b>Legend:</b> N: number of subjects; SARS-CoV-2 positive: positive result from nasal swab, AEs: adverse events, SAEs: serious adverse events |                              |                             |                  |
