# Supplementary material
Source: PubMed Central journal article supplement (PMC8475155)

FIGURE 1S

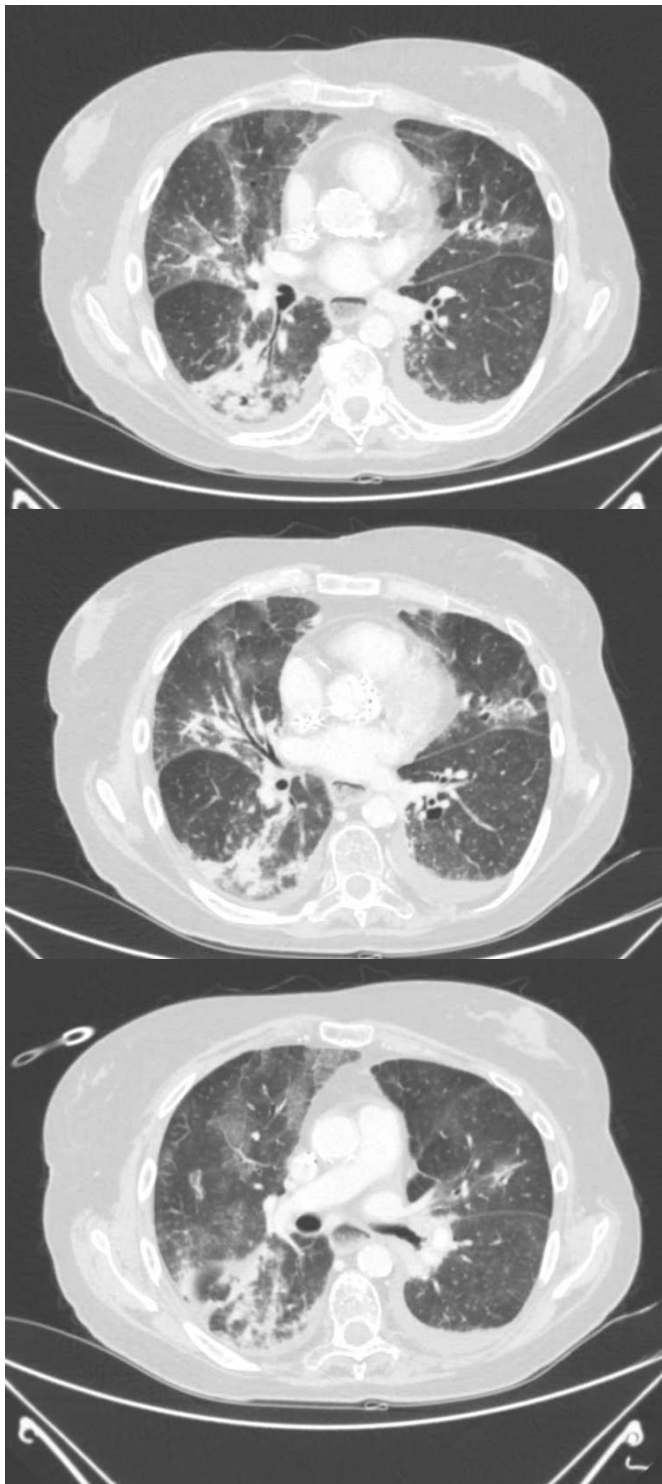

Supplement: jitc-2020-001694supp002.pdf [file jitc-2020-001694supp002.pdf]
